# Supplementary material
Source: PubMed Central journal article supplement (PMC2780304)
Supplement: blood-2009-03-208256_1.pdf [file blood-2009-03-208256_1.pdf]

|                                           |                    |                                                                                                                                                                                                                      |
|-------------------------------------------|--------------------|----------------------------------------------------------------------------------------------------------------------------------------------------------------------------------------------------------------------|
| <b>Median age at diagnosis</b> y. (range) | 56.6 (37.7 - 78.5) | Older age correlates with higher frequency of isolated -13q14 aberrations (p=.02)                                                                                                                                    |
| <b>No. male patients (%)</b>              | 46 (66)            | Males show a higher percentage of CD20+, CD25+, sIgM+ cells (p=.0006, .004, .03) and more frequent chromosomal -11q23 aberrations (p=.01)<br>Females show a higher percentage of chromosomal +12 aberrations (p=.02) |
| <b>No. secondary malignancies (%)</b>     | 27 (38.5)          | Associated with lower presenting WBC (p=.006), longer initial LDT and TTT (P=.02 and .04) as well as lower initial and peak $\beta$ -2MG (P=.03, and .008)                                                           |
